1        **A 10-valent composite mRNA vaccine against both influenza and COVID-19**

2

3        Yang Wang<sup>1,2,#</sup>, Qin Hai Ma<sup>1,#</sup>, Man Li<sup>3,#</sup>, Qianyi Mai<sup>1</sup>, Lin Ma<sup>6</sup>, Hong Zhang<sup>3</sup>, Huiling Zhong<sup>3</sup>,  
4        Nan Cheng<sup>6</sup>, Pei Feng<sup>4</sup>, Peikun Guan<sup>2</sup>, Shengzhen Wu<sup>1</sup>, Lu Zhang<sup>7</sup>, Jun Dai<sup>2,7,\*</sup>, Biliang Zhang<sup>3,5,\*</sup>,  
5        Weiqi Pan<sup>1,4,\*</sup>, Zifeng Yang<sup>1,2,4,\*</sup>

6

7        <sup>1</sup> State Key Laboratory of Respiratory Disease, National Clinical Research Center for Respiratory  
8        Disease, Guangzhou Institute of Respiratory Health, The First Affiliated Hospital of Guangzhou  
9        Medical University, Guangzhou, 510000, China;

10        <sup>2</sup> Guangzhou National Laboratory, Guangzhou, 510000, China;

11        <sup>3</sup> Argona Pharmaceuticals Co., Ltd., Guangzhou, 510000, China;

12        <sup>4</sup> Respiratory Disease AI Laboratory on Epidemic and Medical Big Data Instrument Applications,  
13        Faculty of Innovation Engineering, Macau University of Science and Technology, Macau SAR,  
14        999078, China;

15        <sup>5</sup> State Key Laboratory of Respiratory Disease, Laboratory of Computational Biomedicine,  
16        Guangzhou Institutes of Biomedicine and Health, Chinese Academy of Sciences, Guangzhou  
17        510000, China;

18        <sup>6</sup> Guangzhou RiboBio Co., Ltd, Guangzhou 510000, China;

19        <sup>7</sup> Technology Centre, Guangzhou Customs, Guangzhou 510000, China.

20

21        # These authors contributed equally to this work.

22        \* Correspondence: jeffyah@163.com (Z.Y.); panweiqi@gird.cn (W.P.); bill.zhang@ribobio.com  
23        (B.Z.); 19915302@qq.com (J.D.)

24

## 25 **Abstract**

26 The COVID-19 pandemic caused by SARS-CoV-2 viruses has had a persistent and significant  
27 impact on global public health for four years. Recently, there has been a resurgence of seasonal  
28 influenza transmission worldwide. The co-circulation of SARS-CoV-2 and seasonal influenza  
29 viruses results in a dual burden on communities. Additionally, the pandemic potential of zoonotic  
30 influenza viruses, such as avian Influenza A/H5N1 and A/H7N9, remains a concern. Therefore, a  
31 combined vaccine against all these respiratory diseases is in urgent need. mRNA vaccines, with  
32 their superior efficacy, speed in development, flexibility, and cost-effectiveness, offer a promising  
33 solution for such infectious diseases and potential future pandemics. In this study, we present  
34 FLUCOV-10, a novel 10-valent mRNA vaccine created from our proven platform. This vaccine  
35 encodes hemagglutinin (HA) proteins from four seasonal influenza viruses and two avian  
36 influenza viruses with pandemic potential, as well as spike proteins from four SARS-CoV-2  
37 variants. A two-dose immunization with the FLUCOV-10 elicited robust immune responses in  
38 mice, producing IgG antibodies, neutralizing antibodies, and antigen-specific cellular immune  
39 responses against all the vaccine-matched viruses of influenza and SARS-CoV-2. Remarkably, the  
40 FLUCOV-10 immunization provided complete protection in mouse models against both  
41 homologous and heterologous strains of influenza and SARS-CoV-2. These results highlight the  
42 potential of FLUCOV-10 as an effective vaccine candidate for the prevention of influenza and  
43 COVID-19.

44

45 **Keywords:** mRNA vaccine, multi-valent, SARS-CoV-2, COVID-19, influenza

46

47

48 **Author summary**

49 Amidst the ongoing and emerging respiratory viral threats, particularly the concurrent and  
50 sequential spread of SARS-CoV-2 and influenza, our research introduces FLUCOV-10. This  
51 novel mRNA-based combination vaccine, designed to counteract both influenza and COVID-19,  
52 by incorporating genes for surface glycoproteins from various influenza viruses and SARS-CoV-2  
53 variants. This combination vaccine showed highly effective in preclinical trials, generating strong  
54 immune responses, and ensuring protection against both matching and heterologous strains of  
55 influenza and SARS-CoV-2. FLUCOV-10 represents a significant step forward in our ability to  
56 address respiratory viral threats, showcasing potential as a singular, adaptable vaccine solution for  
57 global health challenges.

58

## 59 Introduction

60 The coronavirus 2019 disease (COVID-19) pandemic, caused by the severe acute respiratory  
61 syndrome coronavirus 2 (SARS-CoV-2), has had a substantial and multifaceted impact on global  
62 public health over the past four years. As of 8 November 2023, the World Health Organization  
63 (WHO) has documented 772 million confirmed cases and approximately 7.0 million cumulative  
64 fatalities (1). These statistics, however, are likely to be underestimated, owing to a lack of  
65 sufficient testing or poor reporting practices in the past years (2). Following a rigorous campaign  
66 involving measures such as vaccinations, medications, and restrictions on social activities, the  
67 COVID-19 pandemic has been brought under control. On 5 May 2023, the WHO lifted the status  
68 of COVID-19 from a global emergency (3); nevertheless, this declaration does not imply that the  
69 fight against infectious diseases has concluded. Numerous breakthrough infections with  
70 SARS-CoV-2 among fully vaccinated individuals suggest the potential need for annual booster  
71 vaccinations against COVID-19 (4).

72  
73 Another major respiratory threat, seasonal influenza virus accounts for approximately one  
74 billion cases each year, with 290,000 to 650,000 death globally (5, 6). A notable reduction in  
75 influenza cases was observed during the 2020-2021 period, likely due to the widespread adoption  
76 of nonpharmaceutical interventions during the COVID-19 pandemic. However, the subsequent  
77 resurgence of influenza, occurring alongside SARS-CoV-2 and other respiratory diseases, has  
78 presented a dual threat to global health systems (7). This scenario is complicated further by the  
79 potential pandemic threat posed by zoonotic influenza viruses. While human infections with avian  
80 and other zoonotic influenza viruses are relatively rare, they are considerably more lethal than  
81 seasonal influenza, partly due to the absence of pre-existing immunity in the population (8, 9). For  
82 example, the highly pathogenic avian influenza A/H5N1 virus has caused 878 cases with 458  
83 fatalities (case fatality rate: 52.2%) since its first report in 1996, and the avian influenza A/H7N9  
84 virus has led to 1568 cases with 616 deaths (39.3%) case fatality rate: since it first emerged in  
85 2013 (10). The resurgence of influenza, the persistence of SARS-CoV-2, and the sporadic severity  
86 of zoonotic influenza highlight the critical need for a comprehensive vaccination strategy.

87  
88 In the realm of vaccine strategies, mRNA-based platforms have been distinguished by their  
89 satisfactory safety profile, high efficacy, adaptability, swift production timelines, and relatively  
90 low manufacturing costs (11, 12). Amid the COVID-19 pandemic, mRNA vaccines encoding the  
91 SARS-CoV-2 spike protein, not only received their initial authorization for human use but also  
92 rapidly became the most widely used globally, credited to their potent efficacy and expedited  
93 development timelines (13-15). However, the vaccines faced reduced effectiveness with the  
94 emergence of omicron variant (16, 17). Consequently, the mRNA vaccines were promptly adapted  
95 to include bivalent components, targeting both the ancestral and the omicron strain, and  
96 demonstrated a superior neutralizing antibody response against omicron compared to the original  
97 mRNA vaccines (18-22). The flexibility of the mRNA vaccine platform is further demonstrated by  
98 its adaptability to other respiratory diseases; for instance, mRNA-LNP vaccines encoding the HA  
99 proteins of avian influenza H10N8 and H7N9 have been shown to be highly immunogenic in  
100 phase 1 clinical trials (23), while a quadrivalent mRNA vaccine for seasonal influenza has  
101 displayed moderate to high immunogenicity in trials spanning phases 1 to 3 (24, 25).

102

103 In this study, we leveraged our established mRNA-LNP vaccine platform (11, 12) to create a  
104 novel 10-valent mRNA vaccine, aimed at targeting a diverse spectrum of respiratory pathogens.  
105 This vaccine is composed of components for all four seasonal influenza viruses (A/H1N1pdm09,  
106 A/H3N2, B/Victoria, B/Yamagata), two avian influenza viruses with pandemic potential (A/H5N1  
107 and A/H7N9), and four strains of SARS-CoV-2 (Wuhan-Hu-1, BQ.1.1, BA.2.75.2, XBB.1.5).  
108 Subsequently, we evaluated the *in vitro* protein expression of this mRNA-based vaccine and  
109 confirmed its immunogenicity in mice. Moreover, we demonstrated its effectiveness in providing  
110 protection against infections from both COVID-19 and influenza.

111

## 112 **Results**

### 113 **Design and characterization of the 10-valent mRNA vaccine (FLUCOV-10)**

114 We developed a 10-valent mRNA vaccine candidate, named FLUCOV-10, which is designed to  
115 provide broad protection against a wide range of influenza and SARS-CoV-2 viruses (Figure 1A).  
116 The FLUCOV-10 comprises mRNAs encoding full-length HAs of each component of the  
117 quadrivalent influenza vaccines for use in the 2022-2023 influenza season in the Northern  
118 Hemisphere (i.e., A/Wisconsin/588/2019 (H1N1) pdm09, A/Darwin/6/2021 (H3N2),  
119 B/Austria/1359417/2021, and B/Phuket/3073/2013), and the HAs of two avian influenza viruses  
120 posing potential pandemic risks (i.e., A/Thailand/NBL1/2006 (H5N1) and  
121 A/Anhui/DEWH72-03/2013 (H7N9)). The HA protein was selected for the influenza component  
122 due to its role as a target for neutralizing antibodies and its key function in viral entry (6). The  
123 FLUCOV-10 also includes mRNAs encoding the full-length spike proteins of ancestral  
124 SARS-CoV-2 virus and three omicron variants (i.e., BQ.1.1, BA.2.75.2, and XBB.1.5).

125

126 To contextualize the sequences of vaccine strains, we conducted phylogenetic analysis using all  
127 the available HA gene sequences of influenza A/H1N1, A/H3N2, A/H5N1, A/H7N9, B/Yamagata,  
128 and B/Victoria collected since 2000, as well as all available SARS-CoV-2 spike genes (Figure 1B  
129 and C). The vaccine strains for seasonal influenza in FLUCOV-10 were selected to represent the  
130 currently circulating strains (Figure 1B), while the vaccine strains for avian influenza viruses were  
131 chosen based on the WHO's recommendations for vaccine candidates (26). In FLUCOV-10, the  
132 inclusion of the ancestral SARS-CoV-2 strain is designed to offer cross-protection against several  
133 variants of concern, such as alpha, beta, gamma, delta and so on (11). Additionally, the  
134 incorporation of three Omicron subvariants in FLUCOV-10 was deliberately designed to address  
135 the newly emerged circulating SARS-CoV-2 variants, which possess escape properties to  
136 neutralization (27, 28) (Figure 1C).

137

138 To assess the *in vitro* expression profile of each component in FLUCOV-10, western-blotting  
139 was performed using HA- or spike-specific antibodies. As anticipated, cell lysates from the  
140 mRNA-transfected HEK293T cells exhibited a high expression level of each component (Figure  
141 1D and E). Among the FLUCOV-10 expressing HAs, five (i.e., A/H1, A/H3, A/H7, B/Yamagata,  
142 and B/Victoria) were expressed in their precursor form (HA0), while A/H5 was present in both its  
143 precursor and cleaved forms (HA1 and HA2) (Figure 1D). This is due to the multibasic amino  
144 acid motif at the cleavage site of A/H5, which is more susceptible to cellular cleavage (29, 30). All

145 the expressed spike proteins were maintained in their full-length form due to the intentional  
146 removal of both the furin-like cleavage motif and the S2 cleavage motif (Figure 1 E).

147

148 After encapsulating the mRNA into lipid nanoparticles (LNP), we assessed the particle size of  
149 each component in FLUCOV-10. The measurements revealed that each mRNA-LNP component  
150 consistently displayed similar average particle sizes, ranging from 90.7 to 103.9 nm (Figure 1F).

151

### 152 **FLUCOV-10 elicits a robust humoral immune response in BALB/c mice**

153 To evaluate the immunogenicity of FLUCOV-10, we intramuscularly administered two doses of  
154 the vaccine to 6-8-week-old BALB/c mice, with a three-week interval between doses. Each dose  
155 contained 50 µg of mRNA, which includes 5 µg of each individual mRNA. A control group of  
156 animals was injected with a placebo. At 14 days post-booster immunization, serum samples were  
157 collected, and HA- or spike-specific antibody responses were determined by ELISA and  
158 micro-neutralization assays. The results showed that compared to placebo group, mice immunized  
159 with FLUCOV-10 produced 5,161-131,072-fold higher IgG antibody titers against all the 10  
160 encoded HAs or spikes ( $p < 0.0001$ ) (Figure 2A and B). In addition, the FLUCOV-10 vaccine  
161 elicited neutralizing antibodies against all the vaccine matched influenza viruses and  
162 SARS-CoV-2 viruses; whereas placebo did not induce detectable neutralizing antibodies against  
163 any of these viruses (Figure 2C and D). Intriguingly, the FLUCOV-10 induced varying levels of  
164 neutralizing antibody titers against different influenza viruses, with titers ranging from 202 to  
165 12,902 (Figure 2C). The neutralizing antibody titers against B/Yamagata and B/Victoria were at  
166 lower levels compared to those against other influenza or SARS-CoV-2 viruses, reflecting the  
167 trend observed in their IgG titers (Figure 2A).

168

169 To explore the reason of the varied antibody responses, we simultaneously administered 5 µg  
170 doses of monovalent mRNA-LNP formulations for each component of FLUCOV-10, to BALB/c  
171 mice using the same vaccination regime. Monovalent mRNA-LNP vaccines induced neutralizing  
172 antibody titers were also at lower levels against B/Yamagata and B/Victoria compared to those  
173 against other influenza viruses (Figure 2C). Moreover, A/H5N1, B/Yamgata, and B/Victoria  
174 neutralizing antibodies were 3.5~6.3-fold lower in mice receiving the FLUCOV-10 vaccine  
175 compared with those receiving A/H5N1, B/Yamgata, and B/Victoria mRNA-LNPs, respectively ( $p$   
176 = 0.0148,  $p < 0.0001$ , and  $p < 0.0001$ , respectively). These findings indicate that the mRNA-LNP  
177 of B/Yamaga and B/Victoria exhibited low immunogenicity and their immunogenicity was further  
178 attenuated by the presence of other components in the multivalent mRNA vaccine formulation.

179

180 In summary, two immunizations with FLUCOV-10 effectively elicited antibody responses  
181 against influenza and SARS-CoV-2 viruses.

182

### 183 **FLUCOV-10 elicits an antigen-specific Th1 cellular immune response in BALB/c mice**

184 To assess the activation of HA- and spike-specific cellular immunity, we determined the  
185 antigen-specific cytokine producing splenocytes in vaccinated mice at 14 days post booster  
186 immunization by ELISpot. The results showed that the FLUCOV-10 elicited significantly higher  
187 HA- and spike-specific interferon  $\gamma$  (IFN- $\gamma$ ) and interleukin-2 (IL-2) producing splenocytes,  
188 compared to those of placebo (Figure 3A and B), while the FLUCOV-10 did not elicit higher IL-4

189 and IL-5 producing splenocytes (Figure 3C and D). These results indicate that the FLUCOV-10  
190 vaccination activates Th1-biased immune responses, aligning with the observation in our  
191 previously developed mRNA vaccine platform (11, 12).

192

193 Of interest, the splenocytes producing IFN- $\gamma$  and IL-2 in response to FLUCOV-10 vaccination  
194 showed varying levels when stimulated with different antigens. Among the influenza HAs,  
195 A/H3-specific IFN- $\gamma$  and IL-2 secreting cells reached the highest level, while those specific to  
196 B/Victoria reached the lowest level (Figure 3A and B). These results correlate with the trend  
197 observed in the subtype-specific HA IgG antibody and neutralizing antibody responses (Figure 2A  
198 and C).

### 199 **FLUCOV-10 protects mice from homologous and heterologous challenge with influenza** 200 **viruses**

201 To explore the protection efficacy against antigenically similar or heterologous influenza  
202 viruses, BALB/c mice immunized with two doses of FLUCOV-10 or placebo were challenged  
203 intranasally with A/California/04/09 (H1N1), rgA/Guangdong/17SF003/2016 (H7N9), or  
204 B/Florida/4/2006 (Yamagata lineage) three weeks after the final immunization and monitored for  
205 their weight loss and survival daily (Figure 4A). The rgA/Guangdong/17SF003/2016 (H7N9)  
206 strain was antigenically similar with the A/H7 components in FLUCOV-10 (31, 32). In contrast,  
207 the A/California/04/09 (H1N1) and B/Florida/4/2006 were both genetically and antigenically  
208 distinct from the corresponding components of FLUCOV-10, as the significant different  
209 neutralizing antibody titers were observed when comparing vaccine-matched viruses and the  
210 challenge viruses to the same mouse sera (i.e., anti-A/Victoria/2570/2019 versus  
211 anti-A/California/04/09; anti- B/Phuket/3073/2013 versus B/Florida/4/2006) (Figure 1C and  
212 Supplemental Figure 1).

213

214 Mice immunized with the FLUCOV-10 showed significantly less weight loss than mice  
215 immunized with the placebo ( $p < 0.01$ ) against challenge by either antigenically matched  
216 (rgA/H7N9) or heterologous virus (A/H1N1 and B/Yamagata) (Figure 4B, E, and H). Remarkably,  
217 while no survival was observed in the placebo-treated groups, the mice receiving FLUCOV-10  
218 were completely protected against both vaccine-matched and heterologous viral challenges  
219 (Supplemental Figure 2A-C). To assess viral loads in upper and lower respiratory tract, mice were  
220 sacrificed 3 and 6 days after challenge, and lung and nasal turbinate tissues were collected for  
221 determination of viral loads by TCID50. Mice in the FLUCOV-10 groups exhibited no detectable  
222 virus in their turbinate or lung tissues at both 3 and 6 days following the challenge with either of  
223 the viruses, whereas mice from corresponding placebo groups showed significantly higher viral  
224 loads in both turbinate and lung tissues (Figure 4C, F, and I). To observe pulmonary lesions and  
225 inflammation, lung tissues at 3 and 6 days post challenge were collected for sectioning and  
226 staining. Mice from the placebo groups exhibited extensive pulmonary lesions and inflammation  
227 at both 3 and 6 days post-challenge with all three viruses (Figure 4D, G, and J). In contrast, mice  
228 immunized with FLUCOV-10 showed either mild or no apparent pulmonary lesions and  
229 inflammation following challenges with any of the viruses.

230

231 In summary, FLUCOV-10 provides complete protection against both homologous and  
232 heterologous influenza viruses, effectively preventing viral replication, lung lesions, and



233 inflammation in the respiratory tract.

234

### 235 **FLUCOV-10 protects mice from challenge with SARS-CoV-2 viruses**

236 To determine the protection efficacy against homologous and heterologous SARS-CoV-2  
237 viruses, K18-hACE2 mice immunized with two doses of FLUCOV-10 or placebo were challenged  
238 intranasally with  $10^{4.5}$  TCID<sub>50</sub> of XBB.1.5 and  $10^4$  TCID<sub>50</sub> of BA.5.2, respectively (Figure 5A).  
239 The XBB.1.5 strain belongs to the same clade as the vaccine component included in FLUCOV-10.  
240 In contrast, the BA.5.2 subvariant is not incorporated in the FLUCOV-10 vaccine formulation.  
241 (Figure 1C).

242

243 Mice immunized with the FLUCOV-10 showed significantly less weight loss than mice  
244 immunized with the placebo against XBB.1.5 and BA.5.2 challenge ( $p = 0.0009$  and  $p = 0.0128$ ,  
245 respectively, at 5 days post challenge) (Figure 4B, E, and H). Of note, while no mice from placebo  
246 groups survived after either XBB.1.5 or BA.5.2 strain challenge, the mice receiving FLUCOV-10  
247 were completely protected against both XBB.1.5 and BA.5.2 virus challenges (Supplemental  
248 Figure 2E and F). To assess viral loads in respiratory tract, mice were sacrificed 3 and 6 days after  
249 challenge, and lungs were collected for determination of viral loads by TCID<sub>50</sub>. Mice in the  
250 FLUCOV-10 groups exhibited no detectable virus in their lungs at both 3 and 6 days post  
251 challenge with either of the viruses, whereas mice from corresponding placebo groups showed  
252 significantly higher viral loads (Figure 4C, F, and I). Pulmonary lesions and inflammation were  
253 determined at 3 and 6 days post challenge. Mice from the placebo groups exhibited moderate to  
254 severe pulmonary lesions and inflammation at both 3 and 6 days post-challenge with both viruses  
255 (Figure 4D, G, and J). In contrast, mice immunized with FLUCOV-10 did not show apparent  
256 pulmonary lesions and inflammation following challenges with either of the viruses.

257

258 In summary, FLUCOV-10 provides complete protection against both homologous and  
259 heterologous SARS-CoV-2 viruses, effectively preventing viral replication, lung lesions, and  
260 inflammation in the respiratory tract.

261

## 262 **Discussion**

263 Given the simultaneous and consecutive circulation of SARS-CoV-2 and seasonal influenza  
264 viruses, coupled with the looming threat posed by zoonotic influenza viruses, there is a  
265 pronounced and urgent need for the development of a combination vaccine targeting both  
266 SARS-CoV-2 and influenza viruses. Recently, various research groups have developed  
267 combination vaccines by using inactivated (33), recombinant protein (34, 35), and mRNA  
268 platforms (36-38). In the present study, we have utilized our previously established mRNA  
269 vaccine platform to design and assess FLUCOV-10, a universal vaccine that targets a broader  
270 range of distinct SARS-CoV-2 and influenza viruses. This vaccine comprises decavalent mRNAs  
271 encoding the full-length HAs of all four seasonal influenza viruses and two avian influenza viruses,  
272 as well as the full-length spikes of four different SARS-CoV-2 strains. This composition allows  
273 FLUCOV-10 to provide extensive protection against a wide spectrum of these respiratory viruses.  
274 To the best of our knowledge, FLUCOV-10 represents the first vaccine candidate that  
275 simultaneously targets SARS-CoV-2, seasonal, and avian influenza.



276

277 Ensuring the immunogenicity and efficacy of each component is a fundamental challenge in the  
278 development of combination vaccines (39). The FLUCOV-10 vaccine addresses this by  
279 incorporating 5 µg of each mRNA component, based on our previous reports showing that two  
280 doses of 5 µg in monovalent or bivalent mRNA vaccines achieved sterilizing immunity in mice, an  
281 effect comparable to a 20 µg dose (11, 12). We dissected the protein expression and immune  
282 response induction for each component of FLUCOV-10. Similar to previous findings (11, 12),  
283 each component in FLUCOV-10 resulted in abundant expression of HA or spike proteins in cell  
284 lysates (Figure 1 D and E), leading to robust component-specific humoral responses (Figure 2)  
285 and Th1-favored cellular responses (Figure 3) following a two-dose regimen. In response to the  
286 constantly evolving and antigenically diverse strains of influenza and SARS-CoV-2, we also  
287 evaluated the cross-reactive immunity conferred by FLUCOV-10. Our findings revealed that  
288 FLUCOV-10 produces strong neutralizing antibodies against antigenically distinct influenza  
289 viruses and inter-sublineage variants of SARS-CoV-2 (Supplemental Figure 1), surpassing known  
290 surrogate correlates of protection (40, 41). In line with expectations, animal challenge studies  
291 showed that FLUCOV-10 provided complete protection to immunized mice against both  
292 homologous and heterologous challenges of influenza and SARS-CoV-2 viruses, evidenced by  
293 significantly less body weight loss, 100% survival rates, undetectable viral loads in the respiratory  
294 tract, and absence of pulmonary lesions and inflammation. These findings suggest that  
295 FLUCOV-10 is a promising candidate vaccine, effectively targeting SARS-CoV-2, seasonal  
296 influenza, and avian influenza viruses simultaneously.

297

298 The full-length membrane-bound HA surface glycoprotein was selected for the influenza  
299 component of FLUCOV-10 due to its high immunogenicity and ability to elicit both  
300 strain-specific and cross-reactive immune responses (42, 43). Interestingly, we observed varying  
301 levels of immunogenicity among the different influenza HA components. Notably, the two mRNA  
302 components corresponding to influenza B viruses showed relatively low immunogenicity, as  
303 evidenced by their production of lower levels of IgG antibodies, neutralizing antibodies, and  
304 IFN-γ and IL-2 secreting lymphocytes, compared to those of other HA components. Observations  
305 from licensed influenza vaccines and a quadrivalent seasonal influenza mRNA vaccine candidate  
306 showed a similar pattern of lower influenza B strain responses (24, 44, 45). Upon further  
307 examination, we found that monovalent mRNA vaccines for both influenza B lineages generated  
308 significantly lower neutralizing antibodies than those for influenza A subtypes. Notably, the  
309 influenza B mRNA components in FLUCOV-10 produced even lower antibody levels compared  
310 to their monovalent counterparts. These results suggest that the reduced efficacy of influenza B  
311 components in FLUCOV-10 arises from both intrinsic factors and interactions within the other  
312 components of the vaccine. This observation warrants further investigation into optimizing the  
313 balance of components in multivalent vaccines.

314

315 The goal of a combined mRNA vaccine is to provide robust immunization across as many  
316 components as possible. Arevalo et al. reported a promising universal influenza mRNA vaccine  
317 comprising 20 HAs from 18 influenza A subtypes and 2 influenza B lineages (46). However, their  
318 study revealed that mice immunized with this 20-HA mRNA vaccine (2.5 µg per component)  
319 suffered a body weight loss of over 10% after being challenged with 5LD<sub>50</sub> of A/California/7/2009

320 (H1N1pdm). In contrast, in the current study, mice vaccinated with FLUCOV-10 (5 µg per  
321 component) did not show obvious weight loss when challenged with 10LD<sub>50</sub> of a comparable  
322 virus. This underscores the need for strategic adjustments in the number and dosage of  
323 components in combined mRNA vaccines to achieve maximum efficacy.

324

325 For the development of multivalent or combined mRNA vaccines, encapsulating each mRNA  
326 encoding separate antigens is a common approach, despite the efficiency of encapsulating all  
327 mRNAs simultaneously (36, 46-48). This method of individual LNP preparation facilitates the  
328 convenient verification of each mRNA vaccine component's qualification, concentration, and  
329 immunogenicity (46). Additionally, in the case of combined vaccines where one component is  
330 already marketed and another is developed subsequently, it is generally necessary to manufacture  
331 each mRNA-LNP separately (47).

332

333 COVID-19 and influenza share challenges related to viral evolution and a decline in vaccine  
334 protection over time (49-52). Both diseases also exhibit seasonal trends (53), underscoring the  
335 potential need for annual booster vaccinations. Our FLUCOV-10 vaccine offers a flexible solution  
336 to these challenges, capable of swiftly adapting to emerging strains. This allows for an annual  
337 update of vaccine components to effectively combat newly emerging mutants or variants. The  
338 combination vaccine approach of FLUCOV-10 also streamlines immunization, reducing the  
339 number of injections, enhancing compliance, and minimizing adverse reactions (54, 55). This  
340 efficiency saves time for families and reduces healthcare visits, easing the burden on both  
341 individuals and healthcare systems. However, a critical aspect to consider is the phenomenon  
342 observed with repeated influenza vaccinations, where a blunted immune response and reduced  
343 vaccine effectiveness have been documented over time (56, 57). This observation highlights a  
344 critical consideration for future combination vaccine strategies involving COVID-19: the  
345 possibility that administering repeated COVID-19 vaccinations in a combination vaccine format  
346 might lead to diminishing immunogenicity. Consequently, further research is crucial to validate  
347 this hypothesis and develop and refine combination vaccine strategies to effectively tackle these  
348 dynamic and evolving viral threats.

349

350 In conclusion, our study highlights the feasibility and efficacy of a broad-spectrum mRNA  
351 vaccine, FLUCOV-10, in addressing the complex landscape of respiratory viral threats.  
352 Furthermore, the FLUCOV-10 vaccine offers a versatile and potentially effective tool in the global  
353 effort to control and prevent respiratory viral diseases. These findings underscore the value of  
354 continuing research and translation into clinical practice to establish the real-world efficacy and  
355 applicability of this vaccine approach.

356

## 357 **Materials and methods**

### 358 **Cells**

359 MDCK cells (CCL-34, American Type Culture Collection [ATCC]), human embryonic kidney  
360 293T cells (CRL-3216, ATCC), and Vero E6 cells (CRL-1586, ATCC) were cultured in  
361 Dulbecco's Modified Eagle medium (DMEM, Gibco) supplemented with 10% fetal bovine serum  
362 (FBS) at 37°C with 5% CO<sub>2</sub>.

## 363 **Viruses**

364 Recombinant influenza viruses containing HA and NA from  
365 A/Victoria/2570/2019(H1N1)pdm09 (GISAID accession No., EPI1804971 and EPI1804972,  
366 respectively), HA and NA from A/Darwin/6/2021(H3N2) (GISAID accession No., EPI1998552  
367 and EPI1998553, respectively), and HA and NA from B/Austria/1359417/2021(Victoria lineage)  
368 (GISAID accession No., EPI1921345, and EPI1921346, respectively) were created in the genetic  
369 background of A/Puerto Rico/8/34 (PR8) or B/Lee/40 as previously described (31). The  
370 recombinant H5N1 influenza virus containing the HA and NA genes derived from  
371 A/Vietnam/1194/2004(H5N1) and the recombinant H7N9 influenza viruses containing the HA and  
372 NA genes derived from A/Anhui/1/2013(H7N9) or A/Guangdong/17SF003/2016(H7N9) were  
373 constructed previously in our laboratory (31, 32, 58). The A/California/04/2009(H1N1) was kindly  
374 provided by Yi Shi (Chinese Academy of Sciences), the B/Florida/4/2006(Yamagata lineage) was  
375 kindly provided by Jingxian Zhao (Guangzhou Medical University), and the B/Phuket/3073/2013  
376 (Yamagata lineage) was obtained from National Institute for Biological Standards and Control  
377 (NIBSC). All the influenza viruses were confirmed by sanger sequencing and propagated in  
378 10-day-old embryonated eggs.

379 The SARS-CoV-2 viruses, including Wuhan-hu-1 (WH), BQ.1.1, BA.2.75.2, XBB.1.5, BA.5.2,  
380 were isolated from COVID-19 patients and were propagated in Vero E6 cells. All experiments  
381 involving these authentic SARS-CoV-2 strains were carried out in the BSL-3 Laboratory of the  
382 Guangzhou Customs District Technology Center.

## 383 **mRNA synthesis**

384 The sequences encoding full-length spike proteins of SARS-CoV-2 viruses and the sequences  
385 encoding full-length HAs of influenza viruses were human codon optimized and cloned into a  
386 plasmid vector with the T7 promoter, 5' and 3' untranslated regions (UTRs) (59, 60), and a 120nt  
387 poly-A tail (61). To improve the spike protein's stability and reduce protease cleavage, 2P  
388 mutations (K986P/V987P), furin cleavage site mutations (RRAR to GGSG), and S2' cleavage site  
389 mutations (KR to AN) were introduced into its encoding sequences as described previously (11).  
390 The mRNAs were synthesized *in vitro* by T7 polymerase mediated transcription where the  
391 uridine-5'-triphosphate (UTP) was substituted with pseudouridine-5'-triphosphate (pseudo-UTP).  
392 Capped mRNAs were generated by supplementing the transcription reactions with RIBO-Cap4.  
393 mRNA was purified by reversed-phase high-performance liquid chromatography (RP-HPLC) (62).  
394 RNA quality was analyzed by bioanalyzer analysis (Agilent 2200 Tape station). mRNA  
395 concentrations were measured by UV spectroscopy.

396 DNA sequences synthesized for this study originated from the following list of spike proteins  
397 and HAs that were included: Wuhan-Hu-1 (GenBank accession No. 43740568),  
398 hCoV-19/Switzerland/TI-EOC-38005531/2022 (BQ.1.1, GenBank accession No. OX366792.2),  
399 hCoV-19/England/PHEC-YY8HAYE/2023 (BA.2.75.2, GISAID accession No.  
400 EPI\_ISL\_16679125), hCoV-19/USA/CT-YNH-2509/2023 (XBB.1.5, GISAID accession No.  
401 EPI\_ISL\_16570202), A/Wisconsin/588/2019 (H1N1)pdm09 (GISAID accession No.  
402 EPI\_ISL\_404460), A/Darwin/6/2021(H3N2) (GISAID accession No. EPI\_ISL\_2233238),  
403 A/Thailand/NBL1/2006 (H5N1) (GenBank accession No. KJ907470:1-1707),  
404 A/Anhui/DEWH72-03/2013 (H7N9) (GenBank accession No. CY181529:22-1704),  
405 B/Austria/1359417/2021 (B/Victoria lineage) (GISAID accession No. EPI\_ISL\_2378894),  
406 B/Phuket/3073/2013 (B/Yamagata lineage) (GISAID accession No. EPI\_ISL\_161843).

#### 407 **mRNA-LNP preparations**

408 The FLUCOV-10 vaccine comprises a total of 50 µg of mRNA, distributed equally among 10  
409 different mRNAs (5 µg each). These mRNAs encode the HA and spike antigens from six influenza  
410 viruses and four SARS-CoV-2 viruses, as detailed above. Each mRNA is separately formulated  
411 into Lipid nanoparticles (LNPs) and then mixed, prior to vialing so 10 different mRNA  
412 formulations are present in the vial. LNPs were prepared by microfluidic mixing using the  
413 previously described method (63). Briefly, lipids were dissolved in ethanol at molar ratios of  
414 45:16:15:1.0 (Ionizable lipid: Cholesterol: DSPC: DMG-PEG2000). The lipid mixture was rapidly  
415 combined with a buffer of 50 mM sodium citrate (pH 4.0) containing mRNA at a volume ratio of  
416 aqueous: ethanol using a microfluidic mixer (PNI Nanosystems, Vancouver, BC, Canada).  
417 Formulations were dialyzed against PBS (pH 7.2) in the dialysis cassettes (Thermo Scientific,  
418 Rockford, IL, USA) for at least 18 h. Formulations were diluted with PBS (pH 7.2) to reach a  
419 required concentration, and then passed through a 0.22-mm filter and stored at 4°C until use.  
420 Formulations were analyzed for particle size by using a ZETASIZER, and the mRNA  
421 encapsulation, residues, endotoxin and bioburdens were also confirmed.

#### 422 **mRNA transfection**

423 293T cells were seeded in 12-well plates at  $1 \times 10^6$  cells per well and cultured at 37 °C in 5%  
424 CO<sub>2</sub> for 16 h. 10 µg of each mRNA encoding HA or spike protein was transfected into 293T cells  
425 using riboFECTTmRNAtransfection Reagent (C11055, Ribobio, Guangzhou, China). Cell  
426 lysates were harvested by RIPA lysis buffer (R0030, Solarbio, Beijing, China) at 48 h after  
427 transfection, and mixed with 5 × SDS-loading, following by centrifugation at 12,000 × g. The  
428 samples were loaded for SDS-PAGE. The HA and spike proteins in cell lysates were then detected  
429 by western blotting using a mouse monoclonal antibody against SARS-CoV-2 spike proteins  
430 (GTX632604, GeneTex), a rabbit polyclonal antibody against influenza A/H1 HA (11055-T62,  
431 Sino Biological), a mouse monoclonal antibody against influenza A/H3 HA (11056-MM03, Sino  
432 Biological), a rabbit polyclonal antibody against influenza A/H5 HA (11062-T62, Sino  
433 Biological) ], a rabbit polyclonal antibody against influenza A/H7 HA (40103-T62, Sino  
434 Biological) a rabbit polyclonal antibody against influenza B/Yamagata lineage HA (11053-T62,  
435 Sino Biological), and a mouse monoclonal antibody against Influenza B/Victoria lineage HA  
436 (11053-MM06, Sino Biological). β-actin was detected using anti-β-actin antibody.

#### 437 **Animal experiments.**

438 BALB/c mouse experiments were performed in accord with Regulations of Guangdong  
439 Province on the Administration of Laboratory Animals and Institutional Animal Care and Use  
440 Committee of Guangzhou Medical University (IACUC Approval No. IACUC-2023-001). Six- to  
441 eight-week-old female BALB/c mice (Guangdong Vital River Laboratory Animal Technology,  
442 Guangzhou, China) were immunized intramuscularly with 5 µg of each monovalent mRNA-LNP  
443 (in a 50 µl volume), 50 µg of FLUCOV-10 (in a 50 µl volume) or an equal volume of placebo and  
444 boosted with an equal dose at 21 days post-initial immunization. Serum samples were collected  
445 prior to initial immunization and 14 days after booster immunization. For influenza virus  
446 challenges, vaccinated mice were anesthetized and infected intranasally with 10LD<sub>50</sub>  
447 A/California/07/2009 (H1N1), 10LD<sub>50</sub> of recombinant A/Guangdong/17SF003/2016 (H7N9)  
448 (referred to as rgA/Guangdong/17SF003/2016 H7N9)), or 3 LD<sub>50</sub> of B/Florida/4/2006 in 50 µl of  
449 PBS at 3 weeks after booster immunization. Weight loss and survival were monitored for 14 days  
450 after challenge. Animals that lost more than 25% of their initial body weight were humanely

451 anesthetized. At 3 and 6 days post challenge, mouse lungs and nasal turbinates were collected for  
452 viral titration and histological analyses.

453 For SARS-CoV-2 challenges, six- to nine-week-old female K18-hACE2 mice (Gempharmatech,  
454 Nanjing, China) were immunized with the same regimen as that of BALB/c mouse experiments.  
455 Three weeks post booster immunization, the mice were infected intranasally with  $10^4$  TCID<sub>50</sub> of  
456 hCoV-19/Uganda/UG1282/2022 (BA.5.2) or  $10^{4.5}$  TCID<sub>50</sub> of hCoV-19/Chile/RM-137638/2022  
457 (XBB.1.5). Weight loss and survival were monitored for 6 days after challenge. At 3 and 6 days  
458 post challenge, mouse lungs were collected for viral titration and histological analyses. All work  
459 with live SARS-CoV-2 virus was performed in the Biosafety Level-3 (BSL-3) containment  
460 laboratories.

#### 461 **Enzyme-linked immunosorbent assay (ELISA)**

462 SARS-CoV-2 spike- and influenza HA-specific IgG antibody titers were determined by ELISA.  
463 96-well plates (JET BIOFIL) were coated with recombinant spike proteins of Wuhan-hu-1  
464 (ACROBiosystems, SPN-C52H4), BA.2.75.2 (ACROBiosystems, SPN-C522r), BQ.1.1  
465 (ACROBiosystems, SPN-C522), or XBB.1.5 variant (ACROBiosystems, SPN-C524i), or  
466 recombinant Influenza HA proteins of A/Wisconsin/588/2019/A/Victoria/2570/2019 (H1N1)  
467 (Sinobiological, 40787-V08H1), A/Darwin/6/2021 (H3N2) (Sinobiological, 40868-V08H),  
468 B/PHUKET/3073/2013 (Sinobiological, 40498-V08B), B/Austria/1359417/2021 (Sinobiological,  
469 40862-V08H), A/Vietnam/1194/2004 (H5N1) (Sinobiological, 11062-V08H1), or  
470 A/Hangzhou/3/2013 (H7N9) (Sinobiological, 40123-V08B) with a concentration of 2 µg/ml at  
471 4°C overnight. The plates were washed three times with PBS containing 0.1% Tween 20 (PBST)  
472 and subsequently blocked with 1% bovine serum albumin in PBST at 37°C for 1 h. After blocking,  
473 100 µl of serial dilutions of heat-inactivated serum sample was added to the plates, followed by  
474 incubation at 37°C for 1 h. Following thorough washes, HRP-conjugated Goat anti-mouse IgG  
475 (H+L) antibody (Proteintech, SA00001-1) was added to the plates and incubated at 37°C for 1 h.  
476 After three additional washes, 100 µL of TMB peroxidase substrate (TIANGEN, PA107-02) was  
477 added to each well and incubated for 15 min before being stopped by adding 2 M H<sub>2</sub>SO<sub>4</sub>, and the  
478 absorbance was measured at 450 nm using a TECAN Infinite M200 Pro plate reader. Endpoint  
479 titers were determined as the reciprocal of the highest serum dilution that exceeded the cut-off  
480 values (calculated as the mean ± SD of negative controls at the lowest dilution).

#### 481 **Micro-neutralization (MN) assay**

482 To determine neutralizing antibody titers against influenza viruses, mouse serum samples were  
483 treated with receptor-destroying enzyme II (RDE II) (Denka-Seiken) for 16 h at 37°C, followed by  
484 heat-inactivation for 30 min at 56°C. The MN assays were performed as previously described (31).  
485 To determine neutralizing antibody titers against SARS-CoV-2 viruses, serum samples collected  
486 from immunized mice were inactivated at 56 °C for 30 min and the MN assays were performed as  
487 described elsewhere (12). The MN titer was defined as the reciprocal of the highest serum dilution  
488 capable of neutralizing 50% of viral infections in MDCK cells (for influenza viral titers) or Vero  
489 E6 cells (for SARS-CoV-2 viral titers). The minimum MN titer detected in this study was 10; thus,  
490 for statistical purposes, all samples from which the MN titer was not detected were given a  
491 numeric value of 5, which represents the undetectable level of MN titer.

#### 492 **ELISpot**

493 Cellular immune responses were determined by using IFN-γ (Dakewe Biotech, 2210005), IL-2  
494 (Mabtech, 3441-4HPW-2), IL-4 (Dakewe Biotech, 2210402), and IL-5 (Mabtech, 3391-4HPW-2)



495 precoated ELISpot kits according to the manufacturer's instructions. Briefly, Spleen lymphocytes  
496 isolated from BALB/c mice 14 days after the booster vaccination and plated at  $2.5 \times 10^5$  cells/well  
497 were added to the pre-coated plates. The spleen lymphocytes were stimulated with 1  $\mu$ g/ml  
498 recombinant spike proteins or HA proteins and cultured at and 37°C and 5% CO<sub>2</sub> for 20 h.  
499 Concanavalin A (Sigma) was used as a positive control, and RPMI 1640 medium (Gibco, Thermo  
500 Fisher Scientific) was used as a negative control. The plates were then washed 6 times with wash  
501 buffer and incubated for 1 h with biotinylated anti-mouse IFN- $\gamma$ , IL-2, IL-4, or IL-5 antibody.  
502 Streptavidin-HRP was added to the plates and incubated for 1 h. After the final washes, the AEC  
503 substrate solution was added and stopped with water. The air-dried plates were read by using  
504 ELISpotreader.

#### 505 **Infectious viral titration by TCID<sub>50</sub>.**

506 The right lung lobes were homogenized in 0.5 DMEM containing 0.3% BSA (Sigma-Aldrich)  
507 and 1% penicillin/streptomycin (Gibco, Thermo Fisher Scientific) for 1 min at 6,000 rpm by using  
508 a homogenizer (Servicebio). The turbinate was homogenized in 1 ml of the same medium. The  
509 debris were pelleted by centrifugation for 10 min at 12,000  $\times$  g. Their infectious virus titers were  
510 determined by TCID<sub>50</sub> with MDCK cells (for influenza viral titers) or Vero E6 cells (for  
511 SARS-CoV-2 viral titers) as previously described (64, 65).

#### 512 **Histopathology.**

513 Mouse left lung lobes were fixed in 10% buffered formalin, paraffin-embedded, sectioned at 4  
514  $\mu$ m, and stained with hematoxylin and eosin (H&E) for histopathological examination.

515

#### 516 **Phylogenetic analysis**

517 The phylogenetic analysis was performed as described previously (46). All available full-length  
518 HA genes collected during January 1, 2000, to June 30, 2023 for the influenza A(H1N1)  
519 (2009-present), A/H3N2 (2000-present), A/H5, A/H7, B/Yamagata, B/Victoria viruses, and spike  
520 genes for SARS-CoV-2 ancestral strains and omicron variants were downloaded from GISAID. To  
521 contextualize the sequences of vaccine strains and challenge strains, we utilized the Nextstrain  
522 pipeline (66) to build two separate phylogenetic trees: one for influenza HAs (A/H1, A/H3, A/H5,  
523 A/H7, B/Yamagata, and B/Victoria) and the other for SARS-CoV-2 spikes (30). For influenza tree,  
524 we randomly subsampled 10 sequences per HA type (for influenza A sequences) or lineage (for  
525 influenza B sequences) for each year. We excluded duplicate sequences, any sequences sampled  
526 before 2000, and sequences with incomplete collection dates or non-nucleotide characters. For the  
527 SARS-CoV-2 tree, we randomly subsampled approximately 1000 sequences from the omicron  
528 lineages based on the pre-analysis results from the Nextstrain pipeline. Following subsampling,  
529 sequences were aligned using MAFFT (67), and divergence phylogenies were constructed with  
530 IQ-TREE under a General Time Reversible (GTR) substitution model (68). Finally, tree plotting  
531 and visualization were carried out using ggtree  
532 (<https://guangchuangyu.github.io/software/ggtree/>).

#### 533 **Statistical analyses.**

534 Statistical analyses were conducted using GraphPad Prism version 9. Data are presented as  
535 geometric means  $\pm$  95% CI for antibody titers, and means  $\pm$  SEM for all other data. For statistical  
536 significance testing, an unpaired *t* test was applied when data showed equal variation between  
537 groups, and Welch's *t* test was used for data with unequal variation. For comparisons involving  
538 multiple groups, one-way ANOVA with Tukey's post-hoc test was employed. To achieve normality,

539 antibody titer data were log-transformed prior to analysis. A *P* value of less than 0.05 was  
540 considered statistically significant.  
541

## 542 **Acknowledgements**

543 The authors thank Yi Fang for her assistance in phylogenetic analyses and thank Qiuwen Tang  
544 for his support in the animal studies. We sincerely thank Dr. George Dacai Liu for his comments  
545 and assistance in revising our manuscript. This work was supported by National Key R&D  
546 Program of China (2021YFC1712904), National Natural Science Foundation of China (82174053,  
547 82361168672, 81761128014 and 31970884), Natural Science Foundation of Guangdong Province  
548 (2022A1515010301), Macao Science and Technology Development Fund (0022/2021/A1 and  
549 005/2022/ALC), Guangzhou Science and Technology Bureau project (202201020523,  
550 202201020449), The Young Top Talent of Science and Technology Innovation Department of  
551 Guangdong Province (2021TQ060189), The Youth Lift Project of China Association for Science  
552 and Technology (2020-2022QNRC001), Open Project of State Key Laboratory of Respiratory  
553 Disease (SKLRD-OP-202001 and SKLRD-OP-202209), Self-supporting Program of Guangzhou  
554 Laboratory, Grant No. SRPG22-007, and Guangdong-Hong Kong-Macao Joint Laboratory of  
555 Respiratory Infectious Diseases Funding Project (GHMJLRID-Z-202105).  
556

## 557 **Competing interests**

558 The authors declared that they have no conflicts of interest to this work.  
559

## 560 **References**

- 561 1. Organization WH. WHO Coronavirus (COVID-19) Dashboard 2023 [Available  
562 from: <https://covid19.who.int/>.
- 563 2. Vasconcelos GL, Pessoa NL, Silva NB, Macedo AMS, Brum AA, Ospina R, et al.  
564 Multiple waves of COVID-19: a pathway model approach. *Nonlinear Dyn.*  
565 2023;111(7):6855-72.
- 566 3. Organization WH. Statement on the fifteenth meeting of the IHR (2005)  
567 Emergency Committee on the COVID-19 pandemic 2023 [updated 5 May 2023].  
568 Available from:  
569 [https://www.who.int/news/item/05-05-2023-statement-on-the-fifteenth-meeting-of-the-](https://www.who.int/news/item/05-05-2023-statement-on-the-fifteenth-meeting-of-the-international-health-regulations-(2005)-emergency-committee-regarding-the-coronavirus-disease-(covid-19)-pandemic)  
570 [international-health-regulations-\(2005\)-emergency-committee-regarding-the-coronav-](https://www.who.int/news/item/05-05-2023-statement-on-the-fifteenth-meeting-of-the-international-health-regulations-(2005)-emergency-committee-regarding-the-coronavirus-disease-(covid-19)-pandemic)  
571 [irus-disease-\(covid-19\)-pandemic](https://www.who.int/news/item/05-05-2023-statement-on-the-fifteenth-meeting-of-the-international-health-regulations-(2005)-emergency-committee-regarding-the-coronavirus-disease-(covid-19)-pandemic).
- 572 4. Krammer F, Ellebedy AH. Variant-adapted COVID-19 booster vaccines. *Science.*  
573 2023;382(6667):157-9.
- 574 5. Organization WH. Influenza (Seasonal) 2023 [updated 3 October, 2023. Available  
575 from: [https://www.who.int/news-room/fact-sheets/detail/influenza-\(seasonal\)](https://www.who.int/news-room/fact-sheets/detail/influenza-(seasonal)).
- 576 6. Wang Y, Tang CY, Wan XF. Antigenic characterization of influenza and  
577 SARS-CoV-2 viruses. *Anal Bioanal Chem.* 2022;414(9):2841-81.
- 578 7. Furlow B. Triple-demic overwhelms paediatric units in US hospitals. *Lancet*  
579 *Child Adolesc Health.* 2023;7(2):86.



- 580 8. Koutsakos M, Kedzierska K, Subbarao K. Immune Responses to Avian Influenza  
581 Viruses. *Journal of immunology*. 2019;202(2):382-91.
- 582 9. Organization WH. Ongoing avian influenza outbreaks in animals pose risk to  
583 humans 2023 [updated 12 July 2023. Available from:  
584 [https://www.who.int/news/item/12-07-2023-ongoing-avian-influenza-outbreaks-in-ani](https://www.who.int/news/item/12-07-2023-ongoing-avian-influenza-outbreaks-in-animals-pose-risk-to-humans)  
585 [mals-pose-risk-to-humans](https://www.who.int/news/item/12-07-2023-ongoing-avian-influenza-outbreaks-in-animals-pose-risk-to-humans).
- 586 10. Organization WH. Avian Influenza Weekly Update Number 920 2023 [updated 3  
587 November, 2023. Available from:  
588 [https://cdn.who.int/media/docs/default-source/wpro---documents/emergency/surveillance/avian-influenza/ai\\_20231103.pdf?sfvrsn=5bc7c406\\_33](https://cdn.who.int/media/docs/default-source/wpro---documents/emergency/surveillance/avian-influenza/ai_20231103.pdf?sfvrsn=5bc7c406_33).  
589
- 590 11. Ma Q, Li R, Guo J, Li M, Ma L, Dai J, et al. Immunization with a Prefusion  
591 SARS-CoV-2 Spike Protein Vaccine (RBMRNA-176) Protects against Viral  
592 Challenge in Mice and Nonhuman Primates. *Vaccines*. 2022;10(10).
- 593 12. Ma Q, Li M, Ma L, Zhang C, Zhang H, Zhong H, et al. SARS-CoV-2 bivalent  
594 mRNA vaccine with broad protection against variants of concern. *Front Immunol*.  
595 2023;14:1195299.
- 596 13. Polack FP, Thomas SJ, Kitchin N, Absalon J, Gurtman A, Lockhart S, et al.  
597 Safety and Efficacy of the BNT162b2 mRNA Covid-19 Vaccine. *The New England*  
598 *journal of medicine*. 2020;383(27):2603-15.
- 599 14. Baden LR, El Sahly HM, Essink B, Kotloff K, Frey S, Novak R, et al. Efficacy  
600 and Safety of the mRNA-1273 SARS-CoV-2 Vaccine. *The New England journal of*  
601 *medicine*. 2021;384(5):403-16.
- 602 15. Creech CB, Walker SC, Samuels RJ. SARS-CoV-2 Vaccines. *Jama*.  
603 2021;325(13):1318-20.
- 604 16. Karim SSA, Karim QA. Omicron SARS-CoV-2 variant: a new chapter in the  
605 COVID-19 pandemic. *Lancet*. 2021;398(10317):2126-8.
- 606 17. Zhao Z, Zhou J, Tian M, Huang M, Liu S, Xie Y, et al. Omicron SARS-CoV-2  
607 mutations stabilize spike up-RBD conformation and lead to a non-RBM-binding  
608 monoclonal antibody escape. *Nature communications*. 2022;13(1):4958.
- 609 18. Chalkias S, Feng J, Chen X, Zhou H, Marshall JC, Girard B, et al. Neutralization  
610 of Omicron Subvariant BA.2.75 after Bivalent Vaccination. *The New England journal*  
611 *of medicine*. 2022;387(23):2194-6.
- 612 19. Chalkias S, Harper C, Vrbicky K, Walsh SR, Essink B, Brosz A, et al. A Bivalent  
613 Omicron-Containing Booster Vaccine against Covid-19. *The New England journal of*  
614 *medicine*. 2022;387(14):1279-91.
- 615 20. Davis-Gardner ME, Lai L, Wali B, Samaha H, Solis D, Lee M, et al.  
616 Neutralization against BA.2.75.2, BQ.1.1, and XBB from mRNA Bivalent Booster. *N*  
617 *Engl J Med*. 2023;388(2):183-5.
- 618 21. Zou J, Kurhade C, Patel S, Kitchin N, Tompkins K, Cutler M, et al. Improved  
619 Neutralization of Omicron BA.4/5, BA.4.6, BA.2.75.2, BQ.1.1, and XBB.1 with  
620 Bivalent BA.4/5 Vaccine. *bioRxiv*. 2022:2022.11.17.516898.
- 621 22. Davis-Gardner ME, Lai L, Wali B, Samaha H, Solis D, Lee M, et al.  
622 Neutralization against BA.2.75.2, BQ.1.1, and XBB from mRNA Bivalent Booster.  
623 *The New England journal of medicine*. 2022.

- 624 23. Feldman RA, Fuhr R, Smolenov I, Mick Ribeiro A, Panther L, Watson M, et al.  
625 mRNA vaccines against H10N8 and H7N9 influenza viruses of pandemic potential  
626 are immunogenic and well tolerated in healthy adults in phase 1 randomized clinical  
627 trials. *Vaccine*. 2019;37(25):3326-34.
- 628 24. Lee IT, Nachbagauer R, Ensz D, Schwartz H, Carmona L, Schaeffers K, et al.  
629 Safety and immunogenicity of a phase 1/2 randomized clinical trial of a quadrivalent,  
630 mRNA-based seasonal influenza vaccine (mRNA-1010) in healthy adults: interim  
631 analysis. *Nature communications*. 2023;14(1):3631.
- 632 25. moderna. Moderna Announces Interim Phase 3 Safety and Immunogenicity  
633 Results for mRNA-1010, a Seasonal Influenza Vaccine Candidate 2023 [updated 16  
634 February, 2023. Available from:  
635 [https://www.accesswire.com/739660/Moderna-Announces-Interim-Phase-3-Safety-an](https://www.accesswire.com/739660/Moderna-Announces-Interim-Phase-3-Safety-and-Immunogenicity-Results-for-mRNA-1010-a-Seasonal-Influenza-Vaccine-Candidate)  
636 [d-Immunogenicity-Results-for-mRNA-1010-a-Seasonal-Influenza-Vaccine-Candidate](https://www.accesswire.com/739660/Moderna-Announces-Interim-Phase-3-Safety-and-Immunogenicity-Results-for-mRNA-1010-a-Seasonal-Influenza-Vaccine-Candidate)  
637 .
- 638 26. Organization WH. Antigenic and genetic characteristics of zoonotic influenza A  
639 viruses and development of candidate vaccine viruses for pandemic preparedness  
640 2022 [updated September 2022. Available from:  
641 [https://cdn.who.int/media/docs/default-source/influenza/who-influenza-recommendati](https://cdn.who.int/media/docs/default-source/influenza/who-influenza-recommendations/vcm-southern-hemisphere-recommendation-2023/202209_zoonotic_vaccinivirusupdate.pdf)  
642 [ons/vcm-southern-hemisphere-recommendation-2023/202209\\_zoonotic\\_vaccinivirusu](https://cdn.who.int/media/docs/default-source/influenza/who-influenza-recommendations/vcm-southern-hemisphere-recommendation-2023/202209_zoonotic_vaccinivirusupdate.pdf)  
643 [pdate.pdf](https://cdn.who.int/media/docs/default-source/influenza/who-influenza-recommendations/vcm-southern-hemisphere-recommendation-2023/202209_zoonotic_vaccinivirusupdate.pdf).
- 644 27. Data OWi. SARS-CoV-2 sequences by variant, Nov 20, 2023 2023 [updated  
645 November 20, 2023. Available from:  
646 <https://ourworldindata.org/grapher/covid-variants-bar>.
- 647 28. Kurhade C, Zou J, Xia H, Liu M, Chang HC, Ren P, et al. Low neutralization of  
648 SARS-CoV-2 Omicron BA.2.75.2, BQ.1.1 and XBB.1 by parental mRNA vaccine or  
649 a BA.5 bivalent booster. *Nature medicine*. 2023;29(2):344-7.
- 650 29. Horimoto T, Nakayama K, Smeekens SP, Kawaoka Y. Proprotein-processing  
651 endoproteases PC6 and furin both activate hemagglutinin of virulent avian influenza  
652 viruses. *Journal of virology*. 1994;68(9):6074-8.
- 653 30. Stieneke-Grober A, Vey M, Angliker H, Shaw E, Thomas G, Roberts C, et al.  
654 Influenza virus hemagglutinin with multibasic cleavage site is activated by furin, a  
655 subtilisin-like endoprotease. *EMBO J*. 1992;11(7):2407-14.
- 656 31. Wang Y, Lv Y, Niu X, Dong J, Feng P, Li Q, et al. L226Q Mutation on Influenza  
657 H7N9 Virus Hemagglutinin Increases Receptor-Binding Avidity and Leads to Biased  
658 Antigenicity Evaluation. *Journal of virology*. 2020;94(20).
- 659 32. Dong J, Chen P, Wang Y, Lv Y, Xiao J, Li Q, et al. Evaluation of the immune  
660 response of a H7N9 candidate vaccine virus derived from the fifth wave  
661 A/Guangdong/17SF003/2016. *Antiviral research*. 2020:104776.
- 662 33. Bao L, Deng W, Qi F, Lv Q, Song Z, Liu J, et al. Sequential infection with H1N1  
663 and SARS-CoV-2 aggravated COVID-19 pathogenesis in a mammalian model, and  
664 co-vaccination as an effective method of prevention of COVID-19 and influenza.  
665 *Signal Transduct Target Ther*. 2021;6(1):200.
- 666 34. Shi R, Zeng J, Xu L, Wang F, Duan X, Wang Y, et al. A combination vaccine  
667 against SARS-CoV-2 and H1N1 influenza based on receptor binding domain

- 668 trimerized by six-helix bundle fusion core. *EBioMedicine*. 2022;85:104297.
- 669 35. Massare MJ, Patel N, Zhou B, Maciejewski S, Flores R, Guebre-Xabier M, et al.  
670 Combination Respiratory Vaccine Containing Recombinant SARS-CoV-2 Spike and  
671 Quadrivalent Seasonal Influenza Hemagglutinin Nanoparticles with Matrix-M  
672 Adjuvant. 2021:2021.05.05.442782.
- 673 36. Ye Q, Wu M, Zhou C, Lu X, Huang B, Zhang N, et al. Rational development of a  
674 combined mRNA vaccine against COVID-19 and influenza. *NPJ vaccines*.  
675 2022;7(1):84.
- 676 37. Pfizer. Pfizer and BioNTech Announce Positive Topline Data for mRNA-based  
677 Combination Vaccine Program Against Influenza and COVID-19 2023 [updated  
678 October 26, 2023. Available from:  
679 [https://www.pfizer.com/news/press-release/press-release-detail/pfizer-and-biontech-an-](https://www.pfizer.com/news/press-release/press-release-detail/pfizer-and-biontech-announce-positive-topline-data-mrna)  
680 [nounce-positive-topline-data-mrna](https://www.pfizer.com/news/press-release/press-release-detail/pfizer-and-biontech-announce-positive-topline-data-mrna).
- 681 38. Moderna. Moderna Announces Positive Phase 1/2 Data from mRNA-1083, the  
682 Company's Combination Vaccine Against Influenza and COVID-19 2023 [updated  
683 October 4, 2023. Available from:  
684 [https://investors.modernatx.com/news/news-details/2023/Moderna-Announces-Positiv-](https://investors.modernatx.com/news/news-details/2023/Moderna-Announces-Positive-Phase-1-2-Data-from-mRNA-1083-the-Company-s-Combination-Vaccine-Against-Influenza-and-COVID-19/default.aspx)  
685 [e-Phase-1-2-Data-from-mRNA-1083-the-Company-s-Combination-Vaccine-Against-In-](https://investors.modernatx.com/news/news-details/2023/Moderna-Announces-Positive-Phase-1-2-Data-from-mRNA-1083-the-Company-s-Combination-Vaccine-Against-Influenza-and-COVID-19/default.aspx)  
686 [fluenza-and-COVID-19/default.aspx](https://investors.modernatx.com/news/news-details/2023/Moderna-Announces-Positive-Phase-1-2-Data-from-mRNA-1083-the-Company-s-Combination-Vaccine-Against-Influenza-and-COVID-19/default.aspx).
- 687 39. Tafreshi SH. Efficacy, safety, and formulation issues of the combined vaccines.  
688 *Expert Rev Vaccines*. 2020;19(10):949-58.
- 689 40. Tsang TK, Cauchemez S, Perera RA, Freeman G, Fang VJ, Ip DK, et al.  
690 Association between antibody titers and protection against influenza virus infection  
691 within households. 2014;210(5):684-92.
- 692 41. Khoury DS, Cromer D, Reynaldi A, Schlub TE, Wheatley AK, Juno JA, et al.  
693 Neutralizing antibody levels are highly predictive of immune protection from  
694 symptomatic SARS-CoV-2 infection. 2021;27(7):1205-11.
- 695 42. Pardi N, Parkhouse K, Kirkpatrick E, McMahon M, Zost SJ, Mui BL, et al.  
696 Nucleoside-modified mRNA immunization elicits influenza virus hemagglutinin  
697 stalk-specific antibodies. *Nature communications*. 2018;9(1):3361.
- 698 43. Impagliazzo A, Milder F, Kuipers H, Wagner MV, Zhu X, Hoffman RM, et al. A  
699 stable trimeric influenza hemagglutinin stem as a broadly protective immunogen.  
700 *Science*. 2015;349(6254):1301-6.
- 701 44. Cowling BJ, Perera R, Valkenburg SA, Leung NHL, Iuliano AD, Tam YH, et al.  
702 Comparative Immunogenicity of Several Enhanced Influenza Vaccine Options for  
703 Older Adults: A Randomized, Controlled Trial. *Clinical infectious diseases : an*  
704 *official publication of the Infectious Diseases Society of America*.  
705 2020;71(7):1704-14.
- 706 45. Reneer ZB, Bergeron HC, Reynolds S, Thornhill-Wadolowski E, Feng L, Bugno  
707 M, et al. mRNA Vaccines Encoding Influenza Virus Hemagglutinin (HA) Elicits  
708 Immunity in Mice from Influenza A Virus Challenge. 2023:2023.11.15.566914.
- 709 46. Arevalo CP, Bolton MJ, Le Sage V, Ye N, Furey C, Muramatsu H, et al. A  
710 multivalent nucleoside-modified mRNA vaccine against all known influenza virus  
711 subtypes. *Science*. 2022;378(6622):899-904.

- 712 47. Scheaffer SM, Lee D, Whitener B, Ying B, Wu K, Liang CY, et al. Bivalent  
713 SARS-CoV-2 mRNA vaccines increase breadth of neutralization and protect against  
714 the BA.5 Omicron variant in mice. *Nature medicine*. 2023;29(1):247-57.
- 715 48. Zeng J, Li Y, Jiang L, Luo L, Wang Y, Wang H, et al. Mpox multi-antigen mRNA  
716 vaccine candidates by a simplified manufacturing strategy afford efficient protection  
717 against lethal orthopoxvirus challenge. *Emerging microbes & infections*.  
718 2023;12(1):2204151.
- 719 49. Menegale F, Manica M, Zardini A, Guzzetta G, Marziano V, d'Andrea V, et al.  
720 Evaluation of Waning of SARS-CoV-2 Vaccine-Induced Immunity: A Systematic  
721 Review and Meta-analysis. *JAMA Netw Open*. 2023;6(5):e2310650.
- 722 50. Markov PV, Ghafari M, Beer M, Lythgoe K, Simmonds P, Stilianakis NI, et al.  
723 The evolution of SARS-CoV-2. *Nature reviews Microbiology*. 2023;21(6):361-79.
- 724 51. Doyon-Plourde P, Przepiorkowski J, Young K, Zhao L, Sinilaite A. Intraseasonal  
725 waning immunity of seasonal influenza vaccine - A systematic review and  
726 meta-analysis. *Vaccine*. 2023;41(31):4462-71.
- 727 52. Petrova VN, Russell CA. The evolution of seasonal influenza viruses. *Nature*  
728 *Reviews Microbiology*. 2018;16(1):47-+.
- 729 53. Wiemken TL, Khan F, Puzniak L, Yang W, Simmering J, Polgreen P, et al.  
730 Seasonal trends in COVID-19 cases, hospitalizations, and mortality in the United  
731 States and Europe. *Scientific reports*. 2023;13(1):3886.
- 732 54. Skibinski DA, Baudner BC, Singh M, O'Hagan DT. Combination vaccines. *J*  
733 *Glob Infect Dis*. 2011;3(1):63-72.
- 734 55. Tzenios N, Tazanios ME, Chahine M. Combining Influenza and COVID-19  
735 Booster Vaccination Strategy to Improve Vaccination Uptake Necessary for Managing  
736 the Health Pandemic: A Systematic Review and Meta-Analysis. *Vaccines*. 2022;11(1).
- 737 56. Belongia EA, Skowronski DM, McLean HQ, Chambers C, Sundaram ME, De  
738 Serres G. Repeated annual influenza vaccination and vaccine effectiveness: review of  
739 evidence. *Expert Rev Vaccines*. 2017;16(7):1-14.
- 740 57. Thompson MG, Cowling BJ. How repeated influenza vaccination effects might  
741 apply to COVID-19 vaccines. *Lancet Respir Med*. 2022;10(7):636-8.
- 742 58. Pan W, Dong Z, Meng W, Zhang W, Li T, Li C, et al. Improvement of influenza  
743 vaccine strain A/Vietnam/1194/2004 (H5N1) growth with the neuraminidase  
744 packaging sequence from A/Puerto Rico/8/34. *Human vaccines &*  
745 *immunotherapeutics*. 2012;8(2):252-9.
- 746 59. Thran M, Mukherjee J, Ponisch M, Fiedler K, Thess A, Mui BL, et al. mRNA  
747 mediates passive vaccination against infectious agents, toxins, and tumors. *EMBO*  
748 *Mol Med*. 2017;9(10):1434-47.
- 749 60. Thess A, Grund S, Mui BL, Hope MJ, Baumhof P, Fotin-Mleczek M, et al.  
750 Sequence-engineered mRNA Without Chemical Nucleoside Modifications Enables an  
751 Effective Protein Therapy in Large Animals. *Molecular therapy : the journal of the*  
752 *American Society of Gene Therapy*. 2015;23(9):1456-64.
- 753 61. Holtkamp S, Kreiter S, Selmi A, Simon P, Koslowski M, Huber C, et al.  
754 Modification of antigen-encoding RNA increases stability, translational efficacy, and  
755 T-cell stimulatory capacity of dendritic cells. *Blood*. 2006;108(13):4009-17.

- 756 62. Kariko K, Muramatsu H, Ludwig J, Weissman D. Generating the optimal mRNA  
757 for therapy: HPLC purification eliminates immune activation and improves  
758 translation of nucleoside-modified, protein-encoding mRNA. *Nucleic acids research*.  
759 2011;39(21):e142.
- 760 63. Patel S, Ryals RC, Weller KK, Pennesi ME, Sahay G. Lipid nanoparticles for  
761 delivery of messenger RNA to the back of the eye. *J Control Release*.  
762 2019;303:91-100.
- 763 64. Organization WH. Manual for the laboratory diagnosis and virological  
764 surveillance of influenza 2011 [Available from:  
765 [https://apps.who.int/iris/bitstream/handle/10665/44518/9789241548090\\_eng.pdf;jsess](https://apps.who.int/iris/bitstream/handle/10665/44518/9789241548090_eng.pdf;jsessionid=AF0FFCECE2F1C0F120B2A8C0B281272F?sequence=1)  
766 [ionid=AF0FFCECE2F1C0F120B2A8C0B281272F?sequence=1](https://apps.who.int/iris/bitstream/handle/10665/44518/9789241548090_eng.pdf;jsessionid=AF0FFCECE2F1C0F120B2A8C0B281272F?sequence=1)].
- 767 65. Wang Y, Lench J, Kohler D, DeLiberto TJ, Tang CY, Li T, et al. SARS-CoV-2  
768 Exposure in Norway Rats (*Rattus norvegicus*) from New York City. *mBio*.  
769 2023;14(2):e0362122.
- 770 66. Hadfield J, Megill C, Bell SM, Huddleston J, Potter B, Callender C, et al.  
771 Nextstrain: real-time tracking of pathogen evolution. *Bioinformatics*.  
772 2018;34(23):4121-3.
- 773 67. Katoh K, Misawa K, Kuma K, Miyata T. MAFFT: a novel method for rapid  
774 multiple sequence alignment based on fast Fourier transform. *Nucleic acids research*.  
775 2002;30(14):3059-66.
- 776 68. Minh BQ, Schmidt HA, Chernomor O, Schrempf D, Woodhams MD, von  
777 Haeseler A, et al. IQ-TREE 2: New Models and Efficient Methods for Phylogenetic  
778 Inference in the Genomic Era. *Molecular biology and evolution*. 2020;37(5):1530-4.  
779



780 **Figures and figure legends**

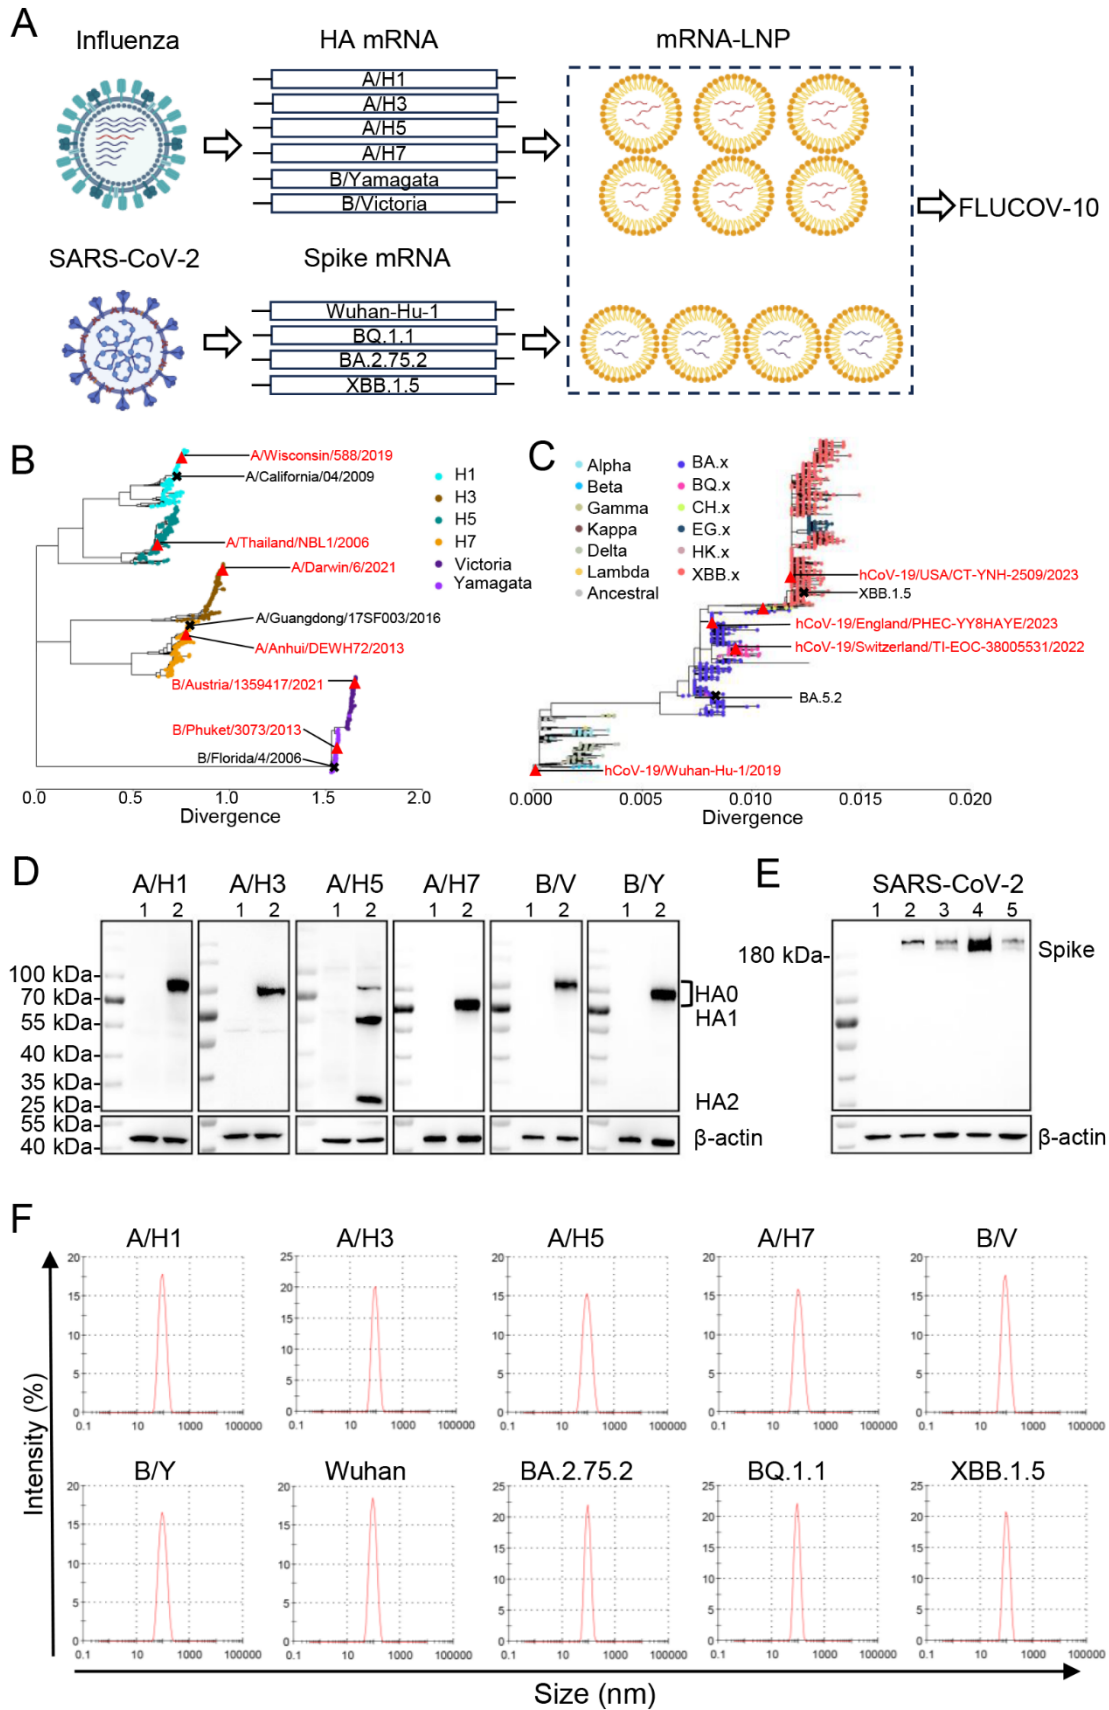

781

782 **Figure 1. Design and characterization of 10-valent mRNA vaccine (FLUCOV-10).**

783 A. Schematic illustration of the FLUCOV-10 formulation, a 10-valent combination mRNA  
784 vaccine targeting both influenza and COVID-19. It includes mRNAs encoding the full-length HA  
785 proteins from influenza A virus subtypes A/H1, A/H3, A/H5, and A/H7, and from influenza B  
786 virus lineages B/Yamagata and B/Victoria. Additionally, it encodes full-length spike proteins from  
787 SARS-CoV-2 variants Wuhan-Hu-1, BQ.1.1, BA.2.75.2, and XBB.1.5. Each mRNA component is  
788 individually encapsulated in lipid nanoparticles (LNPs) prior to being combined into the final  
789 FLUCOV-10 formulation. B and C. Phylogenetic trees were created for influenza HAs (B) and  
790 SARS-CoV-2 spikes (C) by using Nextstrain. The vaccine HAs or spike are indicated with red  
791 triangles and the challenge viruses are indicated with an “X”. D. Expression of  
792 FLUCOV-10-mRNA-encoded HA proteins in 293T cells was determined by western blotting.  
793 Lane 1, 293T cells with mock transfection; lane 2, 293T cells with indicated mRNA transfection;  
794 E. Expression of FLUCOV-10-mRNA-encoded Spike proteins. Lane 1, 293T cells with mock  
795 transfection; lane 2-5, 293T cells with Wuhan-Hu-1, BQ.1.1, BA.2.75.2, and XBB.1.5 mRNA  
796 transfection, respectively.  $\beta$ -actin was used as western blotting loading control.

797



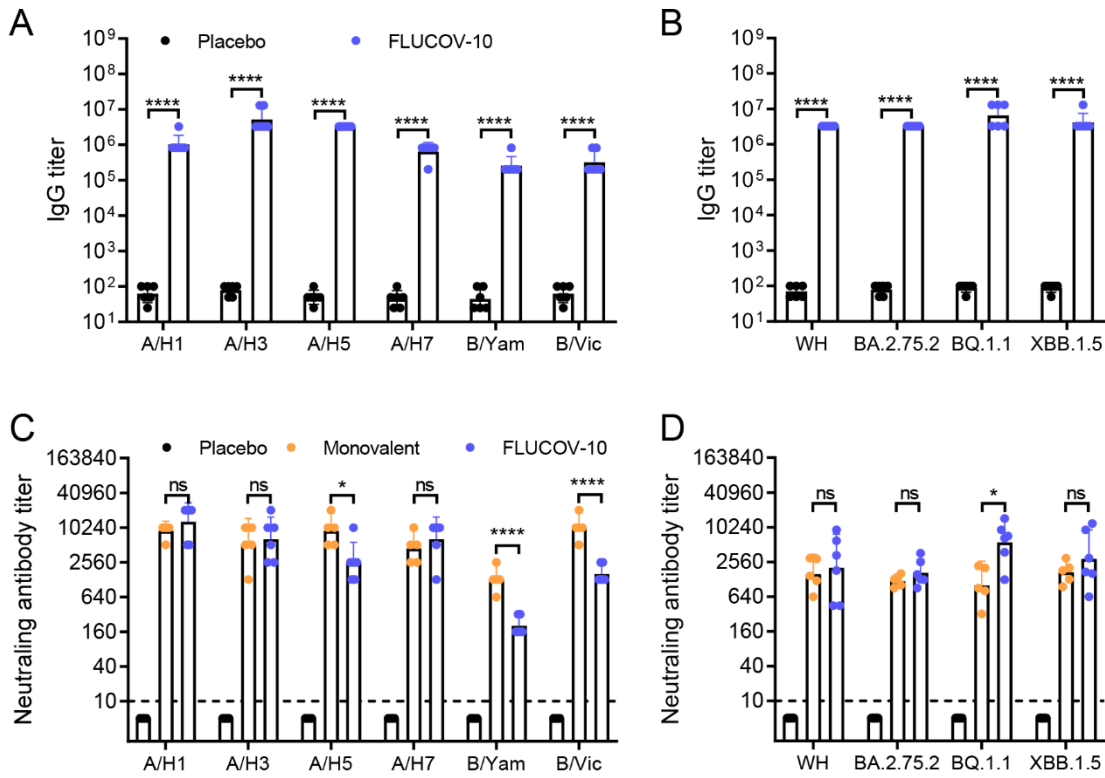

798

799

800 **Figure 2. FLUCOV-10 immunization elicits a robust humoral immune response in BALB/c**  
 801 **mice.**

802 A and B. BALB/c mice were vaccinated intramuscularly (i.m.) with the FLUCOV-10 (a combined  
 803 total dose of 50  $\mu$ g of mRNA, including 2.5  $\mu$ g of each mRNA) or a placebo. Vaccine matched  
 804 influenza HA-specific (A) or SARS-CoV-2 spike-specific (B) IgG antibody titers 14 days post the  
 805 second immunization were determined by ELISA. C and D. BALB/c mice were vaccinated i.m.  
 806 with FLUCOV-10, monovalent mRNA vaccines (5  $\mu$ g) derived from each component of  
 807 FLUCOV-10, or a placebo. Neutralizing antibody titers against vaccine matched influenza viruses  
 808 (C) or SARS-CoV-2 viruses (D) were determined 14 days post second immunization by  
 809 micro-neutralization assays. Data are presented as geometric means  $\pm$  95% CI (n = 5 or 6). ns,  
 810 non-significant; \*,  $p < 0.05$ ; \*\*,  $p < 0.001$ ; \*\*\*,  $p < 0.0001$ .

811

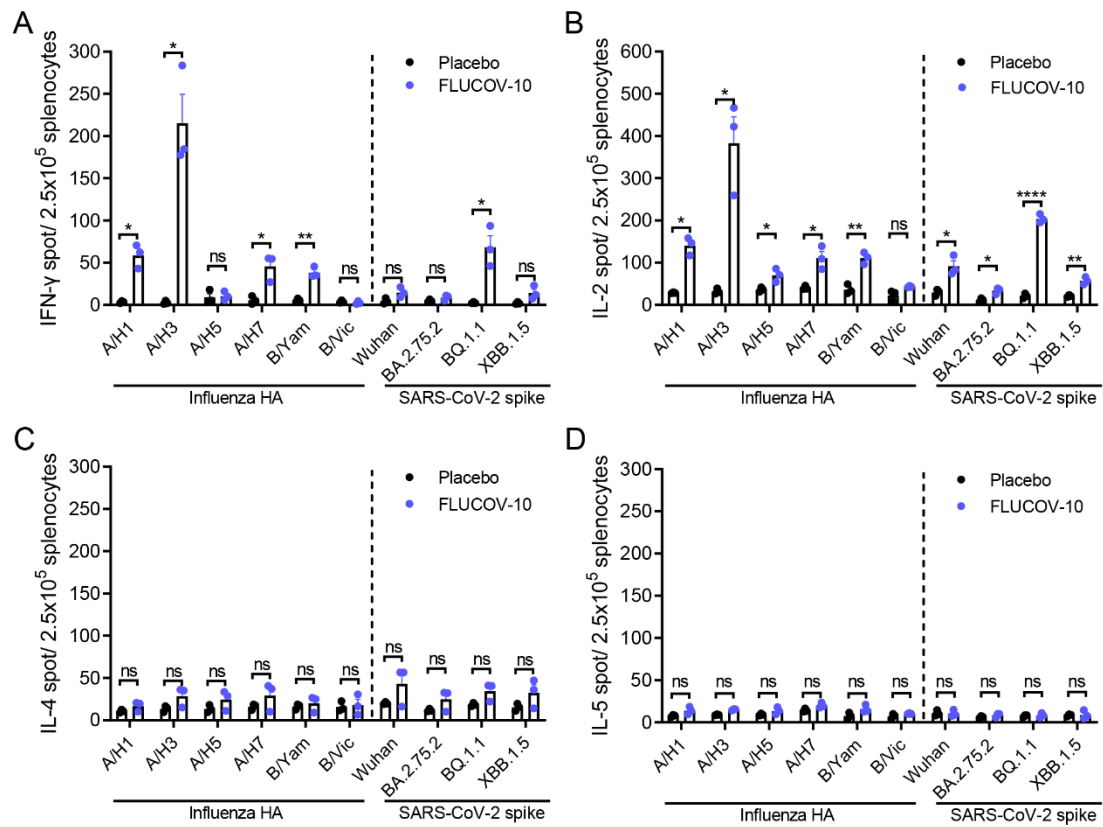

812

813

814 **Figure 3. FLUCOV-10 immunization elicits an antigen-specific Th1-biased cellular immune**  
 815 **response in BALB/c mice.**

816 BALB/c mice were vaccinated intramuscularly (i.m.) with two doses of the FLUCOV-10 or a  
 817 placebo, three weeks apart. Vaccine matched HA- or spike-specific splenocytes producing IFN- $\gamma$   
 818 (A), IL-2 (B), IL-4 (C), or IL-5 (D) were determined 14 days post second immunization by  
 819 ELISpot. Data are presented as mean  $\pm$  SEM (n = 3). ns, non-significant; \*,  $p < 0.05$ ; \*\*,  $p < 0.01$ ;  
 820 \*\*\*\*,  $p < 0.0001$ .

821

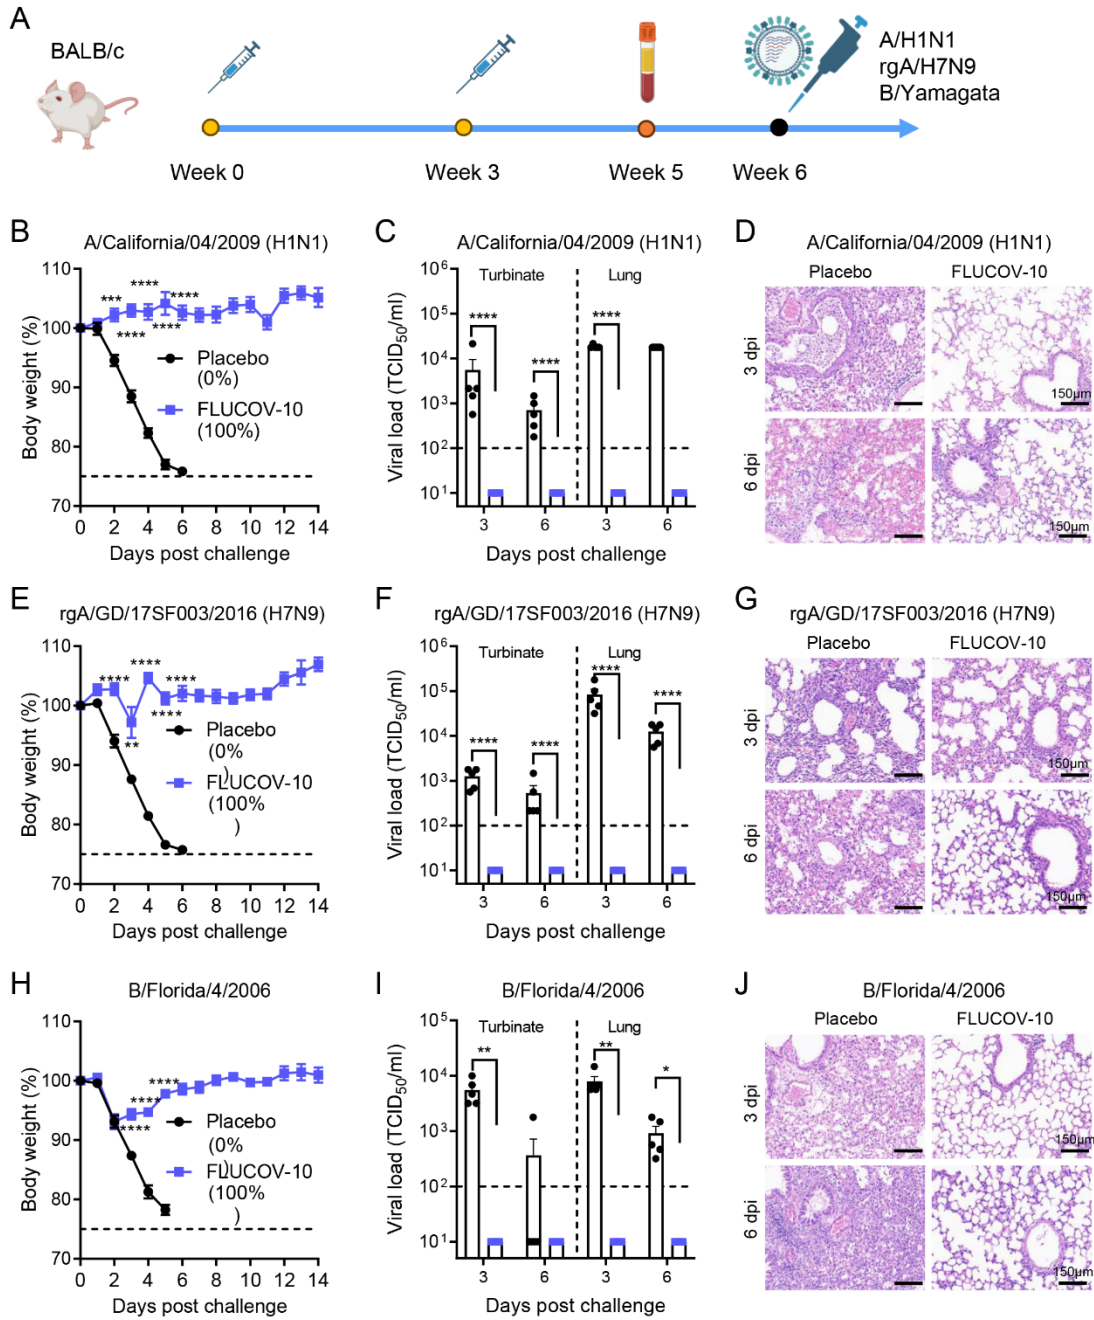

822

823 **Figure 4. FLUCOV-10 protects mice from homologous or heterologous challenge with**  
 824 **influenza viruses.**

825 A. Schematic diagram of the experimental design. BALB/c Mice were immunized with 50  $\mu$ g of  
 826 FLUCOV-10 or each volume of a placebo and boosted with the same dose after three weeks.  
 827 Serum samples were collected 14 days post the second immunization. The mice were challenged 3  
 828 weeks post second immunization with  $10 \times$  mLD<sub>50</sub> of A/California/04/2009 (H1N1) (B-D) or  $10 \times$   
 829 mLD<sub>50</sub> of rgA/Guangdong/17SF003/2016 (H7N9) (E-G) or  $3 \times$  mLD<sub>50</sub> of B/Florida/4/2006  
 830 (B/Yamagata) (H-J). B, E, and H, Weight changes and survival rates were recorded for 14 days (n  
 831 = 7). B, E, and H, Viral titers in the turbinate or lung tissues from influenza-infected mice (n = 5 at  
 832 each indicated day). C, F, and I, H&E staining of lung tissues from influenza-infected mice.

833

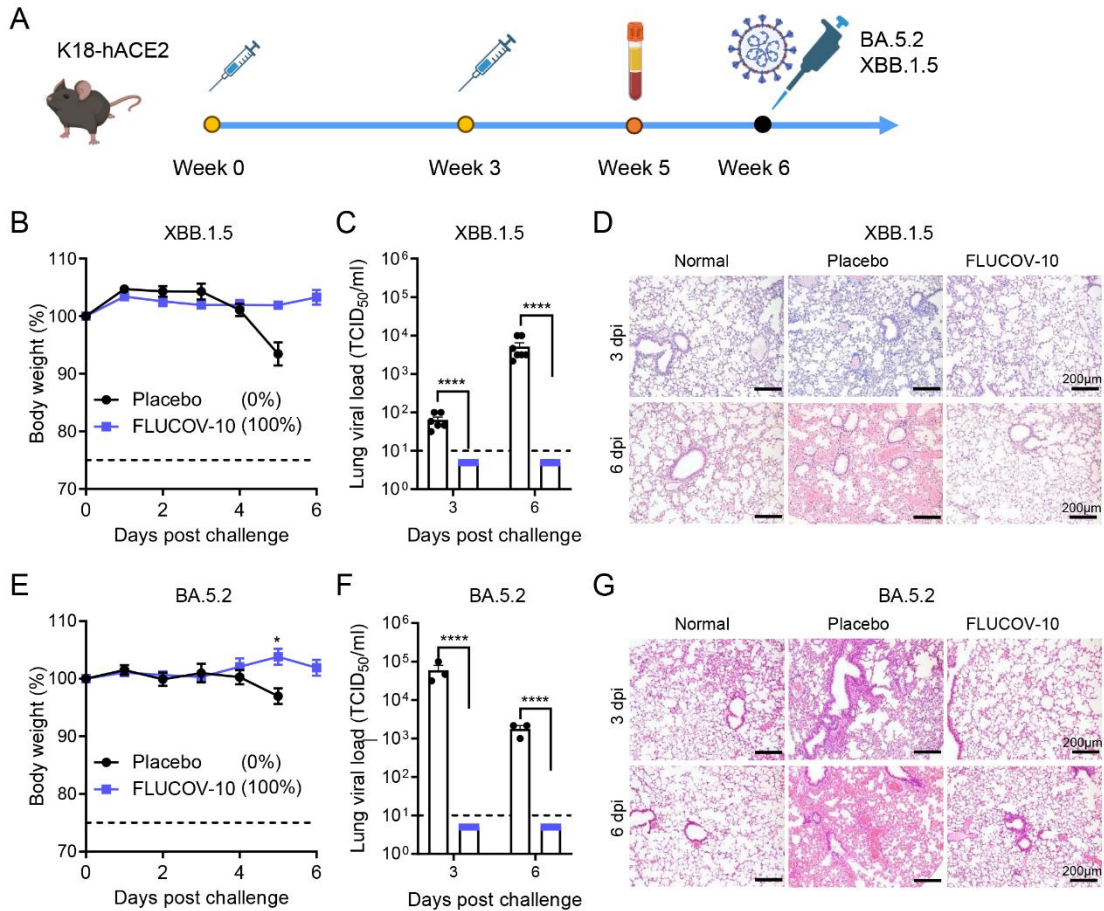

834

835 **Figure 5. FLUCOV-10 protects mice from challenge with SARS-CoV-2 viruses.**

836 A. Schematic diagram of the experimental design. K18-hACE2 mice were immunized with 50  $\mu$ g  
 837 of FLUCOV-10 or each volume of a placebo and boosted with the same dose after three weeks.  
 838 Serum samples were collected 14 days post the second immunization. The mice were challenged 3  
 839 weeks post the second immunization with  $10^{4.5}$  TCID<sub>50</sub> of hCoV-19/Chile/RM-137638/2022  
 840 (XBB.1.5) (B-D) or  $10^4$  TCID<sub>50</sub> of hCoV-19/Uganda/UG1282/2022 (BA.5.2) (E-G). B and E,  
 841 Weight changes and survival rates were recorded for 14 days (n = 7 or 4). C and F: Viral titers in  
 842 the lung tissues from SARS-CoV-2-infected mice (n = 5 or 3 at each indicated day). D and G,  
 843 H&E staining of lung tissues from infected or normal mice.

844

845 **Supplementary Information**

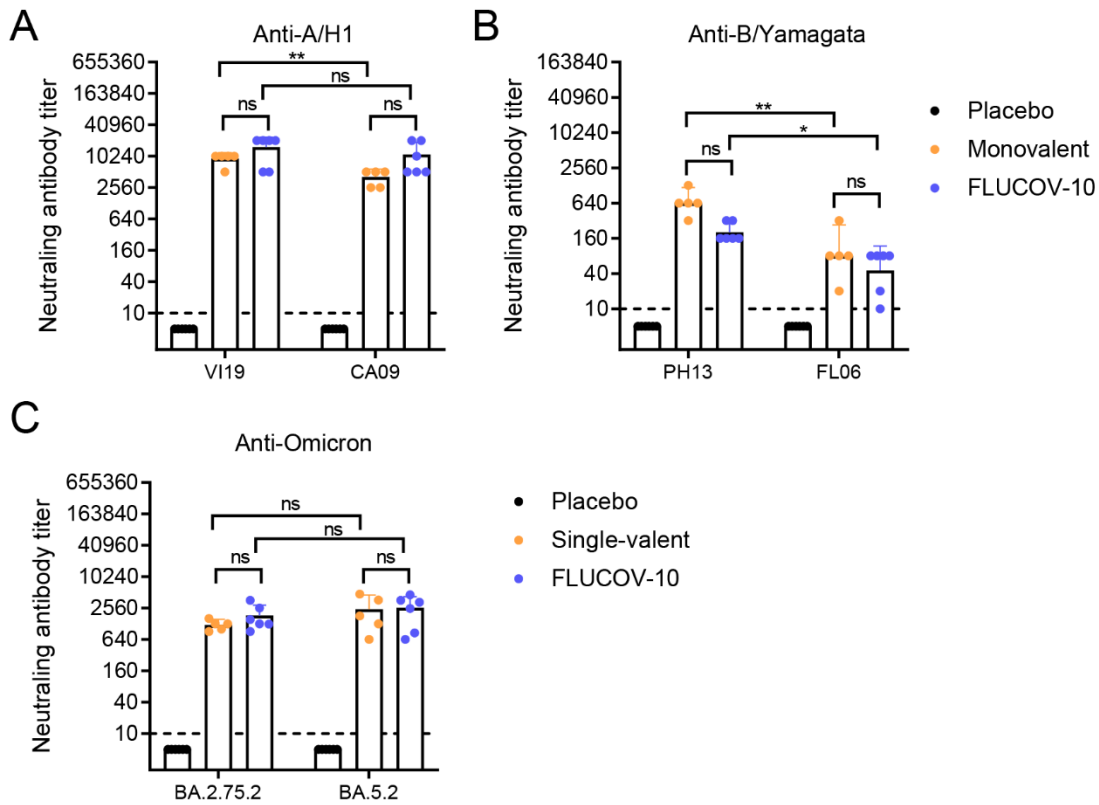

846

847 **Supplemental Figure 1. FLUCOV-10 immunization elicits a cross-reactive humoral immune**  
 848 **response in BALB/c mice (related to Figure 2).**

849 A. BALB/c mice were vaccinated i.m. with the FLUCOV-10, monovalent A/H1 mRNA vaccines  
 850 derived from FLUCOV-10 or a placebo. Neutralizing antibody titers against vaccine matched  
 851 (A/Victoria/2570/2019, VI19) and antigenically distinct (A/California/04/2009, CA09)  
 852 A/H1N1pdm09 influenza viruses were determined 14 days post second immunization by  
 853 micro-neutralization assays. B. BALB/c mice were vaccinated i.m. with the FLUCOV-10,  
 854 monovalent B/Yamagata mRNA vaccines derived from FLUCOV-10 or a placebo. Neutralizing  
 855 antibody titers against vaccine matched (B/Phuket/3073/2013, PH13) and antigenically distinct  
 856 (B/Florida/4/2006, FL06) B/Yamagata influenza viruses were determined 14 days post second  
 857 immunization by micro-neutralization assays. Data are presented as geometric means  $\pm$  95% CI (n  
 858 = 5 or 6). C. BALB/c mice were vaccinated i.m. with the FLUCOV-10, monovalent BA.2.75.2  
 859 mRNA vaccines derived from FLUCOV-10 or a placebo. Neutralizing antibody titers against  
 860 vaccine matched (BA.2.75.2) and antigenically distinct (BA.5.2) SARS-CoV-2 viruses were  
 861 determined 14 days post second immunization by micro-neutralization assays. ns,  
 862 non-significant; \*,  $p < 0.05$ ; \*\*,  $p < 0.01$ .

863

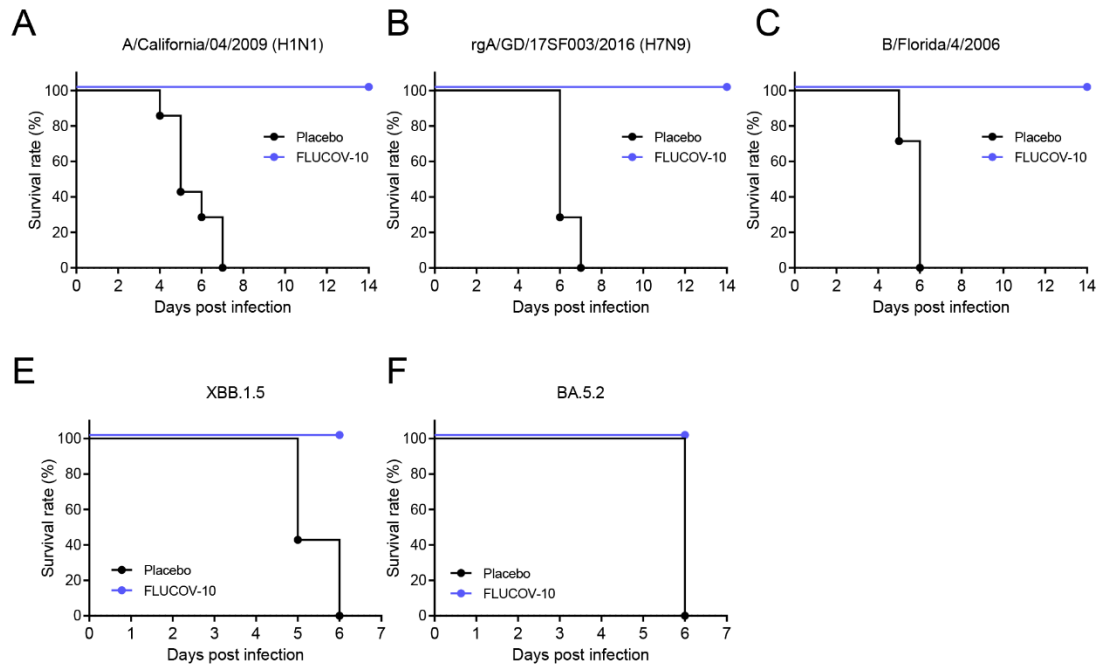

864

865 **Supplemental Figure 2. Survival Rates in Mice Immunized with FLUCOV-10 and**  
866 **Challenged with Influenza or SARS-CoV-2 Viruses (related to Figure 4).**

867 The mice were challenged 3 weeks post second immunization with indicated viruses and the  
868 survival rates were monitored for 7 or 14 days.

869

870
